# Supplementary material for: Comparative Transcriptome Analysis of Storage Root Reveals Regulatory Mechanisms of Lignin Biosynthesis During Root Development in Two Sweetpotato Cultivars
Source: Research Square preprint supplement (doi:10.21203/rs.3.rs-850254/v1), 2021-09-01
Supplement: Supplementary file 1 [file 56c9e3f9f9853fb136233a44.xlsx]

## Sheet: Table S2
Table S2 Statistics of transcripts length distribution before and after correction.
Sample	Transcripts length interval	<500bp	500-1kbp	1k-2kbp	2k-3kbp	>3kbp	Total	average length
Ib_M	Number of transcripts	9245	12194	22565	7071	1062	52137	1253
Ib_M	Number of Genes	2084	4256	10148	3955	705	21148	1457
