# Supplementary material for: Comparative Transcriptome Analysis of Storage Root Reveals Regulatory Mechanisms of Lignin Biosynthesis During Root Development in Two Sweetpotato Cultivars
Source: Research Square preprint supplement (doi:10.21203/rs.3.rs-850254/v1), 2021-09-01
Supplement: Supplementary file 2 [file 6e9fb42eb5bd4cd6d5f489ae.xlsx]

## Sheet: Table S1
Table S1 Statistics of circular consensus sequencing (CCS)
Sample	CCS_number	Min_length	Max_length	Mean_length	N50	FLNC_number
Ib_M	741084	51	14896	1322	1701	571229
