# Supplementary material for: Comparative Transcriptome Analysis of Storage Root Reveals Regulatory Mechanisms of Lignin Biosynthesis During Root Development in Two Sweetpotato Cultivars
Source: Research Square preprint supplement (doi:10.21203/rs.3.rs-850254/v1), 2021-09-01
Supplement: Supplementary file 3 [file 6fbfdfb9d2e24c8262b4d702.xlsx]

## Sheet: anthocyanin synthesis
Table S3 DEG related to lignin synthesis
preferredName	Gene_id	J29_readcount	J25_readcount	log2FoldChange	pval	qvalue	significant	Arabidopsis homology gene	J29_D3_FPKM	J29_D2_FPKM	J29_D1_FPKM	J25_D3_FPKM	J25_D2_FPKM	J25_D1_FPKM
PAL	transcript_HQ_Ib_M_transcript25238/f2p0/1213	32.5817	80.6265	-1.3072	0.012817	0.036597	TRUE	At2g37040	1.72	13.3267	11.8367	6.01667	6.95333	7.23
PAL	transcript_HQ_Ib_M_transcript3311/f8p0/2497	326.866	3013.43	-3.2046	4.2111e-23	2.1855e-21	TRUE	At2g37040	7.39	291.48	200.857	94.6533	177.05	321.423
PAL	transcript_HQ_Ib_M_transcript2375/f3p0/2607	258.984	1564.39	-2.5947	2.2722e-16	6.1791e-15	TRUE	At3g10340	5.61	41.6633	77.0567	46.89	86.8133	60.6033
PAL	transcript_HQ_Ib_M_transcript8156/f2p0/2000	52.4147	444.144	-3.083	2.9634e-16	7.9285e-15	TRUE	At2g37040	1.52667	17.4433	15.6033	18.03	25.61	20.6267
PAL	transcript_HQ_Ib_M_transcript2530/f2p0/2595	268.553	1605	-2.5793	4.0264e-16	1.0615e-14	TRUE	At2g37040	5.81333	271.673	178.58	48.3267	112.643	230.433
PAL	transcript_HQ_Ib_M_transcript2979/f2p0/2507	288.112	544.135	-0.91733	0.003514	0.012111	TRUE	At3g10340	6.46667	38.55	67.1167	17.0567	26.7433	19.05
PAL	transcript_HQ_Ib_M_transcript30873/f11p0/1018	106.893	1085.56	-3.3442	3.8124e-23	1.9995e-21	TRUE	At2g37040	7.15333	200.043	130.3	102.247	199.553	381.157
PAL	transcript_HQ_Ib_M_transcript3215/f6p0/2477	140.562	2567.56	-4.1911	5.1682e-35	6.568e-33	TRUE	At3g10340	3.24667	147.423	119.45	81.6567	113.15	90.7833
trans-cinnamate 4-monooxygenase	transcript_HQ_Ib_M_transcript24326/f6p0/1292	122.807	1321.56	-3.4278	5.4801e-25	3.3326e-23	TRUE	At2g30490.1	6.00333	58.8167	58.9967	91.2367	88.8933	91.5
cinnamate 4-monooxygenase (C4H)	transcript_HQ_Ib_M_transcript28864/f2p0/1073	122.872	774.082	-2.6553	1.3918e-15	3.4838e-14	TRUE	At2g30490.1	7.71667	79.2867	63.0167	68.08	73.89	212.57
trans-cinnamate 4-monooxygenase	transcript_HQ_Ib_M_transcript12801/f14p0/1721	338.999	1535.98	-2.1798	1.8723e-12	3.2559e-11	TRUE	At2g30490.1	11.6267	89.1933	80.6833	74.3933	87.7833	230.3
trans-cinnamate 4-monooxygenase	transcript_HQ_Ib_M_transcript10309/f3p0/1870	302.406	3514.82	-3.5389	5.9055e-27	4.3043e-25	TRUE	At2g30490.1	9.49333	125.513	133.49	154.423	150.1	153.39
trans-cinnamate 4-monooxygenase	transcript_HQ_Ib_M_transcript16411/f3p0/1589	340.02	758.728	-1.158	0.00020011	0.00095872	TRUE	At2g30490.1	12.8267	142.673	143.627	40.3833	36.3333	34.5133
4-coumarate-CoA ligase(4CL)	transcript_HQ_Ib_M_transcript10314/f7p0/1866	59.0846	763.451	-3.6917	6.233e-25	3.7674e-23	TRUE	At1g51680.1	1.87667	35.0067	28.1633	33.5633	44.0667	52.1333
Shikimate O-hydroxycinnamoyltransferase(HCT)	transcript_HQ_Ib_M_transcript12187/f3p0/1766	1629.8	4649.45	-1.5124	1.6172e-06	1.1663e-05	TRUE	AT5G42800.1	54.4067	258.457	149.457	218.08	388.823	270.633
cinnamoyl-CoA reductase(CCR)	transcript_HQ_Ib_M_transcript17303/f6p0/1551	507.4	1275.72	-1.3301	1.4541e-05	8.9335e-05	TRUE	At1g15950.1	19.9367	66.1833	114.177	70.0033	121.997	74.6667
cinnamyl-alcohol dehydrogenase(CAD)	transcript_HQ_Ib_M_transcript26179/f2p0/1186	17.7451	130.421	-2.8777	2.795e-08	2.6768e-07	TRUE	At4g37980.1	0.956667	2.85667	0.476667	10.0967	12.39	1.75667
cinnamyl-alcohol dehydrogenase(CAD)	transcript_HQ_Ib_M_transcript21490/f4p0/1364	355.752	845.272	-1.2485	4.1816e-05	0.00023326	TRUE	At4g37990.1	16.3467	30.9433	20.17	54.6167	12.7667	28.9633
cinnamyl alcohol dehydrogenase(CAD)	transcript_HQ_Ib_M_transcript22370/f8p0/1336	40.5261	770.937	-4.2497	1.097e-30	1.0507e-28	TRUE	{At4g37990.1	1.93	492.25	143.777	51.03	441.26	476.18
cinnamyl alcohol dehydrogenase(CAD)	transcript_HQ_Ib_M_transcript17496/f4p0/1561	661.548	1322.18	-0.999	0.0061459	0.019579	TRUE	At3g19450.1	25.7967	28.5367	51.49	72.2567	56.96	76.3333
cinnamyl-alcohol dehydrogenase(CAD)	transcript_HQ_Ib_M_transcript21594/f4p0/1371	223.906	469.714	-1.0689	0.0011492	0.0045558	TRUE	At4g37990.1	10.2	169.577	108.443	30.0067	142.353	195.693
cinnamyl alcohol dehydrogenase(CAD)	transcript_HQ_Ib_M_transcript21316/f2p0/1383	20.3188	519.094	-4.6751	3.4251e-30	3.1291e-28	TRUE	At4g37990.1	0.933333	343.32	109.94	32.8567	360.62	375.86
cinnamyl alcohol dehydrogenase(CAD)	transcript_HQ_Ib_M_transcript22990/f7p0/1301	91.1051	548.212	-2.5891	1.1545e-13	2.2684e-12	TRUE	At4g39330.1	4.42333	32.6267	46.02	37.52	38.1867	46.1933
caffeic acid 3-O-methyltransferase(COMT)	transcript_HQ_Ib_M_transcript39164/f2p0/658	211.342	88.5551	1.2549	0.017948	0.04861	TRUE	At1g61010.1	27.12	15.9967	12.8133	16.2833	21.4867	7.86333
caffeic acid 3-O-methyltransferase(COMT)	transcript_HQ_Ib_M_transcript23311/f2p0/1289	264.829	127.206	1.0579	0.0040803	0.013771	TRUE	At5g54160.1	13.0067	66.5167	53.88	8.79333	12.5633	15.6167
caffeic acid 3-O-methyltransferase(COMT)	transcript_HQ_Ib_M_transcript18458/f2p0/1499	366.585	1489.74	-2.0228	7.0902e-11	9.9268e-10	TRUE	At5g54160.1	15.0167	136.077	183.507	85.1167	180.11	235.647
caffeoyl-CoA O-methyltransferase(CCoAMT)	transcript_HQ_Ib_M_transcript44442/f4p0/451	819.822	171.002	2.2613	8.0138e-11	1.1126e-09	TRUE	At4g34050.1	231.77	160.967	232.66	69.0633	42.4633	42.82
caffeoyl-CoA O-methyltransferase(CCoAMT)	transcript_HQ_Ib_M_transcript32411/f9p0/915	30.3387	350.401	-3.5298	2.3943e-13	4.5466e-12	TRUE	At4g26220.1	2.38667	96.2	107.807	38.2033	310.743	138.533
caffeoyl-CoA O-methyltransferase(CCoAMT)	transcript_HQ_Ib_M_transcript32284/f6p0/936	18.5457	51.8292	-1.4827	0.015206	0.042297	TRUE	At4g34050.1	1.41333	30.5767	51.6567	5.5	17.6567	16.8733
caffeoyl-CoA O-methyltransferase(CCoAMT)	transcript_HQ_Ib_M_transcript32370/f2p0/922	11.3512	72.8197	-2.6815	1.1679e-05	7.3088e-05	TRUE	At4g34050.1	0.873333	32.7667	44.2133	7.91667	29.8233	33.2433
caffeoyl-CoA O-methyltransferase(CCoAMT)	transcript_HQ_Ib_M_transcript30918/f14p0/986	19.7004	139.815	-2.8272	2.5221e-08	2.4308e-07	TRUE	At4g34050.1	1.36333	55	72.12	13.7967	48.4833	38.7333
coniferyl-aldehyde dehydrogenase(REF1)	transcript_HQ_Ib_M_transcript4403/f2p0/2290	83.2816	18.5505	2.1665	0.00015588	0.00076439	TRUE	At3g48000.1	2.05	2.42	1.81333	0.65	0.443333	0.16
coniferyl-aldehyde dehydrogenase(REF1)	transcript_HQ_Ib_M_transcript15137/f2p0/1637	17.8412	68.1651	-1.9338	0.00079785	0.0033049	TRUE	At1g23800.1	0.646667	0.973333	0.753333	3.53667	2.49	1.90667
coniferyl-aldehyde dehydrogenase(REF1)	transcript_HQ_Ib_M_transcript12918/f2p0/1746	53.4099	205.572	-1.9445	4.0025e-06	2.7082e-05	TRUE	At3g48000.1	1.81333	5.01	3.79333	9.79333	6.81667	4.68667
coniferyl-aldehyde dehydrogenase(REF1)	transcript_HQ_Ib_M_transcript12720/f5p0/1777	1509.76	3721.73	-1.3017	2.1781e-05	0.00012951	TRUE	At3g48000.1	50.12	34.5867	19.52	173.897	59.6	49.8067
coniferyl-aldehyde dehydrogenase(REF1)	transcript_HQ_Ib_M_transcript9427/f8p0/1841	1972.33	3976.72	-1.0117	0.0008509	0.0035011	TRUE	At3g48000.1	62.1	39.3	37.79	178.297	79.2133	56.3767
coniferyl-aldehyde dehydrogenase(REF1)	transcript_HQ_Ib_M_transcript12315/f27p0/1681	26.2663	107.074	-2.0273	7.5154e-05	0.0003952	TRUE	At3g48000.1	0.923333	1.91667	1.68	5.33333	2.24	1.84333
cinnamyl-alcohol dehydrogenase(CAD)	transcript_HQ_Ib_M_transcript26179/f2p0/1186	17.7451	130.421	-2.8777	2.795e-08	2.6768e-07	TRUE	At4g37980.1	0.956667	2.85667	0.476667	10.0967	12.39	1.75667
cinnamyl-alcohol dehydrogenase(CAD)	transcript_HQ_Ib_M_transcript22990/f7p0/1301	91.1051	548.212	-2.5891	1.1545e-13	2.2684e-12	TRUE	At4g39330.1	4.42333	32.6267	46.02	37.52	38.1867	46.1933
cinnamyl-alcohol dehydrogenase(CAD)	transcript_HQ_Ib_M_transcript21316/f2p0/1383	20.3188	519.094	-4.6751	3.4251e-30	3.1291e-28	TRUE	At4g37990.1	0.933333	343.32	109.94	32.8567	360.62	375.86
cinnamyl-alcohol dehydrogenase(CAD)	transcript_HQ_Ib_M_transcript21594/f4p0/1371	223.906	469.714	-1.0689	0.0011492	0.0045558	TRUE	At4g37990.1	10.2	169.577	108.443	30.0067	142.353	195.693
cinnamyl-alcohol dehydrogenase(CAD)	transcript_HQ_Ib_M_transcript17496/f4p0/1561	661.548	1322.18	-0.999	0.0061459	0.019579	TRUE	At3g19450.1	25.7967	28.5367	51.49	72.2567	56.96	76.3333
cinnamyl-alcohol dehydrogenase(CAD)	transcript_HQ_Ib_M_transcript22370/f8p0/1336	40.5261	770.937	-4.2497	1.097e-30	1.0507e-28	TRUE	At4g37990.1	1.93	492.25	143.777	51.03	441.26	476.18
cinnamyl-alcohol dehydrogenase(CAD)	transcript_HQ_Ib_M_transcript21490/f4p0/1364	355.752	845.272	-1.2485	4.1816e-05	0.00023326	TRUE	At4g37990.1	16.3467	30.9433	20.17	54.6167	12.7667	28.9633
caffeoyl-CoA O-methyltransferase	transcript_HQ_Ib_M_transcript31932/f2p0/950	27.3231	316.372	-3.5334	1.2855e-16	3.5804e-15	TRUE	At4g26220.1	1.95	75.74	91.2567	32.6433	255.627	117.857
peroxidase	transcript_HQ_Ib_M_transcript22946/f2p0/1314	535.599	144.426	1.8908	0.008057	0.024734	TRUE	{NA}	25.3033	30.7867	16.0967	9.77	17.6233	8.10333
peroxidase	transcript_HQ_Ib_M_transcript23460/f5p0/1290	86.4956	249.666	-1.5293	0.00053534	0.0023198	TRUE	{NA}	4.29333	52.3967	43.86	17.1467	46.6	43.8367
peroxidase	transcript_HQ_Ib_M_transcript22210/f3p0/1351	9.5773	71.0743	-2.8916	3.4164e-06	2.3412e-05	TRUE	{NA}	0.46	6.31333	9.45333	4.61	9.14667	6.17667
peroxidase	transcript_HQ_Ib_M_transcript25439/f2p0/1213	38.0116	179.038	-2.2358	8.9377e-07	6.7245e-06	TRUE	{NA}	2.02	33.9667	157.02	13.34	40.54	46.7733
peroxidase	transcript_HQ_Ib_M_transcript26346/f3p0/1164	7.15396	30.1318	-2.0745	0.0080992	0.024833	TRUE	{NA}	0.403333	1.67333	2.12333	2.37667	6.57667	22.4967
peroxidase	transcript_HQ_Ib_M_transcript24587/f2p0/1244	3.02152	16.6559	-2.4627	0.014869	0.04149	TRUE	{NA}	0.16	0.833333	0.98	1.19667	4.34333	9.39333
peroxidase	transcript_HQ_Ib_M_transcript21045/f5p0/1376	30.2183	363.949	-3.5902	2.5584e-18	8.5675e-17	TRUE	{NA}	1.38333	23.89	37.7767	23.12	30.4433	28.73
peroxidase	transcript_HQ_Ib_M_transcript24105/f5p0/1262	16.5212	221.448	-3.7446	3.4965e-13	6.5456e-12	TRUE	{NA}	0.846667	28.67	41.71	15.7067	26.04	21.4733
peroxidase	transcript_HQ_Ib_M_transcript38581/f2p0/705	1.56979	13.9586	-3.1525	0.0053088	0.017265	TRUE	{NA}	0.186667	1.92667	10.13	2.30333	3.46667	11.1533
peroxidase	transcript_HQ_Ib_M_transcript23260/f4p0/1200	50.73	188.56	-1.8941	1.2658e-05	7.8669e-05	TRUE	{NA}	2.73667	30.51	33.4633	14.23	42.4533	20.0267
peroxidase	transcript_HQ_Ib_M_transcript24981/f4p0/1221	6.55165	27.2161	-2.0545	0.0099064	0.029431	TRUE	{NA}	0.353333	1.01333	1.49333	2.02333	5.16667	17.02
peroxidase	transcript_HQ_Ib_M_transcript23917/f2p0/1279	60.5665	347.523	-2.5205	5.1035e-11	7.3104e-10	TRUE	{NA}	3.04667	55.1667	99.7833	24.22	42.24	57.4033
peroxidase	transcript_HQ_Ib_M_transcript22863/f9p0/1270	1481.97	4523.6	-1.61	4.6918e-07	3.6852e-06	TRUE	{NA}	73.32	174.553	150.19	317.437	183.963	175.933
peroxidase	transcript_HQ_Ib_M_transcript24226/f8p0/1239	17.719	421.635	-4.5726	2.2645e-25	1.4252e-23	TRUE	{NA}	0.93	18.75	53.4467	30.5833	45.64	97.2133
