# Supplementary material for: Comparative Transcriptome Analysis of Storage Root Reveals Regulatory Mechanisms of Lignin Biosynthesis During Root Development in Two Sweetpotato Cultivars
Source: Research Square preprint supplement (doi:10.21203/rs.3.rs-850254/v1), 2021-09-01
Supplement: Supplementary file 4 [file d8a132c8c7087b2c150a3739.xlsx]

## Sheet: Sheet1
	Table S4 The primer of qRT-PCR
	gene	primer name	primer sequence (5`-3`)
	Transcript14570	14570-qRT-S	GAGGACCCTCTCCAGCGTAT
		14570-qRT-A	CCCTATGATCTTCGCCGCTT
	Transcript11924	11924-qRT-S	GTCACCGTAGCTTGGCATCT
		11924-qRT-A	TCACCTCGTCTGGTTTCACG
	Transcript10314	10314-qRT-S	CCATAGCTAAGAGCCCTGCC
		10314-qRT-A	CTGACCAAGTTTGGCGTTGG
	Transcript17940	17940-qRT-S	ATTGGAGAGTCACGTTGCGT
		17940-qRT-A	CTCCCACAAGTGAGCAGGAG
	Transcript18458	18458-qRT-S	CATGTTGGCGCATAATCCCG
		18458-qRT-A	CGGAAGTGTCGGAAACCAGA
	Transcript22370	22370-qRT-S	GGTTGCTGACGAGCACTTTG
		22370-qRT-A	ACAACGCCAATGTGCATTCC
	Transcript23368	23368-qRT-S	GGTGGGGCTTTAACCGTGTA
		23368-qRT-A	TCACCGTGCAGACGTAACAA
	Transcript23494	23494-qRT-S	GAGGGTTTTCCGAGACCGTT
		23494qRT-A	GGGCTTGATGGGATCCTTGT
	Transcript30056	30056-qRT-S	AACCTTTAAGACGGCGGAGG
		30056-qRT-A	TTGAGGTCATAGTCGCTGGC
	Transcript33328	33328-qRT-S	ACTTGCCAATTGCCAGGAGA
		33328-qRT-A	GGCTTAGATGAACCCGCCAT
	Transcript30918	30918-qRT-S	GCCATGAAAGAGCTTCGGGA
		30918-qRT-A	GCCAGTGTAGACGCCAATCT
	IbACTIN	IbACTIN-S	CTGGTGTTATGGTTGGGATGG
		IbACTIN-A	GGGGTGCCTCGGTAAGAAG
